# Supplementary material for: Brucein D augments the chemosensitivity of gemcitabine in pancreatic cancer via inhibiting the Nrf2 pathway
Source: Springer Nature journal article supplement (doi:10.1186/s13046-022-02270-z), 2022-03-10
Supplement: MOESM2 [file 20207926]

**Additional file 1: Table S1: List of primary antibodies used in this study.** Abbreviations: CST: purchased from the Cell Signalling Technology, Danvers, MA, USA; SCB: Santa Cruz Biotechnology, Santa Cruz, CA, USA.

| Primary antibody | Obtained from | Cat. No    | Dilution    |
|------------------|---------------|------------|-------------|
| Nrf2             | SCB           | sc-365949  | 1:500       |
| Nrf2             | Proteintech   | 16396-1-AP | 1:100 (IHC) |
| Keap-1           | CST           | 8047S      | 1:1500      |
| HO-1             | SCB           | sc-136960  | 1:500       |
| NQO-1            | SCB           | sc-32793   | 1:1000      |
| $\gamma$ -GCSm   | SCB           | sc-22754   | 1:1000      |
| AKR1B10          | Proteintech   | 18252-1-AP | 1:1000      |
| MRP1             | SCB           | sc-18835   | 1:500       |
| MRP5             | SCB           | sc-376965  | 1:500       |
| $\beta$ -actin   | SCB           | sc-69879   | 1:1000      |
| GAPDH            | Abcam         | ab-181602  | 1:1000      |
| ubiquitin        | SCB           | sc-166553  | 1:1000      |
| Caspase-3        | SCB           | sc-7272    | 1:1000      |
| Caspase-9        | SCB           | sc-56076   | 1:1000      |
| PARP             | SCB           | sc-7150    | 1:1000      |

**Additional file 1: Table S2:** Primer sequences used for the genotyping of transgenic mice.

| <b>Genes</b>           | <b>Primer Sequences</b>                       |
|------------------------|-----------------------------------------------|
| Kras <sup>tm4Tyj</sup> | 22907 (F): 5'-TGTCTTTCCCCAGCACAGT-3'          |
|                        | 22908 (Common): 5'-CTGCATAGTACGCTATACCCTGT-3' |
|                        | oIMR9592 (R): 5'-GCAGGTCGAGGGACCTAATA-3'      |
| Trp53 <sup>tm1Bm</sup> | oIMR8543 (F): 5'-GGTTAAACCCAGCTTGACCA-3'      |
|                        | oIMR8544 (R): 5'-GGAGGCAGAGACAGTTGGAG-3'      |
|                        | 21557 (F): 5'-GCAGTGGAGAACTGTCAAAGC -3'       |
| Pdx1-Cre               | oIMR7338 (F): 5'-CTAGGCCACAGAATTGAAAGATCT-3'  |
|                        | oIMR7339 (R): 5'-GTAGGTGGAAATTCTAGCATCATCC-3' |
|                        | oIMR9377 (R): 5'-ATGTTTAGCTGGCCCAAATG-3'      |
